# Supplementary material for: General synthesis of neighboring dual-atomic sites with a specific pre-designed distance via an interfacial-fixing strategy
Source: PubMed Central journal article supplement — Nat Commun. 2025 Jan 2;16:334. doi: 10.1038/s41467-024-55630-y (PMC11697254; doi:10.1038/s41467-024-55630-y), 2025-01-02
Supplement: 41467_2024_55630_MOESM2_ESM.pdf [file 41467_2024_55630_MOESM2_ESM.pdf]

## Description of Additional Supplementary Files

**Supplementary Data 1** - The atomic coordinates of the optimized structure for Fe<sub>1</sub>-N<sub>4</sub>-O<sub>2</sub>.

**Supplementary Data 2** - The atomic coordinates of the optimized structure for Fe<sub>2</sub>-N<sub>6</sub>-O<sub>2</sub>-ver.

**Supplementary Data 3** - The atomic coordinates of the optimized structure for Fe<sub>2</sub>-N<sub>6</sub>-O<sub>2</sub>-par.

**Supplementary Movie 1** - Mini fan powered by two Fe<sub>2</sub>-N<sub>6</sub>-based Zn-air batteries

**Supplementary Movie 2** - LED powered by two Fe<sub>2</sub>-N<sub>6</sub>-based Zn-air batteries.
